# Supplementary material for: A close competition between O–H⋯O and O–H⋯π hydrogen bonding: IR spectroscopy of anisole–methanol complex in helium nanodroplets
Source: Royal Society of Chemistry journal article supplement (doi:10.1039/d0cp02589e), 2020-01-01
Supplement: d0cp02589e1.pdf [file d0cp02589e1.pdf]

***Supplementary Information***

*for*

**A close competition between O-H...O and O-H... $\pi$  hydrogen bonding: IR spectroscopy of anisole-methanol complex in helium nanodroplets**

Tarun Kumar Roy, Devendra Mani, Gerhard Schwaab and Martina Havenith

Lehrstuhl für Physikalische Chemie II,

Ruhr-Universität Bochum, 44801, Bochum, Germany

## 1. NBO analysis of anisole...methanol complexes

The second-order perturbation energy,  $E^{(2)}$ , for the overlaps between different orbitals of anisole and methanol-d4 units in the experimentally observed structures of anisole...methanol complex are summarized in Table S1.

**Table S1:** Second order perturbation energy  $E^{(2)}$  values for interaction between donar and acceptor NBOs. The calculations were performed at MP2/6-311++G (d,p) level theory. The atomic labels are same as given in the *Section I*.

| Conformer   | Interaction | Donor (i)                         | Acceptor(j*)                          | $E^{(2)}$ (kJ/mol) |
|-------------|-------------|-----------------------------------|---------------------------------------|--------------------|
| Structure 1 | O-H...O     | O <sub>12</sub> (n <sub>σ</sub> ) | O <sub>17</sub> -H <sub>18</sub> (σ*) | 9.87               |
|             |             | O <sub>12</sub> (n <sub>p</sub> ) | O <sub>17</sub> -H <sub>18</sub> (σ*) | 6.15               |
| Structure 2 | O-H...O     | O <sub>12</sub> (n <sub>σ</sub> ) | O <sub>17</sub> -H <sub>18</sub> (σ*) | 1.04               |
|             |             | O <sub>12</sub> (n <sub>p</sub> ) | O <sub>17</sub> -H <sub>18</sub> (σ*) | 7.90               |
|             | C-H...π     | C <sub>1</sub> =C <sub>6</sub>    | C <sub>19</sub> -H <sub>20</sub> (σ*) | 0.83               |
| Structure 3 | O-H...π     | C <sub>2</sub> =C <sub>3</sub>    | O <sub>17</sub> -H <sub>18</sub> (σ*) | 2.67               |
|             | C-H... O    | O <sub>17</sub> (n <sub>σ</sub> ) | C <sub>13</sub> -H <sub>16</sub> (σ*) | 0.37               |
|             |             | O <sub>17</sub> (n <sub>p</sub> ) | C <sub>13</sub> -H <sub>16</sub> (σ*) | 1.25               |
| Structure 4 | O-H...π     | C <sub>1</sub> =C <sub>6</sub>    | O <sub>17</sub> -H <sub>18</sub> (σ*) | 2.17               |
|             |             | C <sub>4</sub> =C <sub>5</sub>    | O <sub>17</sub> -H <sub>18</sub> (σ*) | 0.79               |

## 2. Pickup curves of water at the observed bands:

The experimental bands observed at 2659.1, 2663.5, 2678.4, 2689.2, and 2690.8  $\text{cm}^{-1}$  are assigned to anisole-methanol complexes. To examine if there is any contribution from water molecules at these observed bands, we recorded the change in intensity of the depletion signal as a function of water partial pressure, as shown in the Figure S1. For this, we added anisole in the first chamber, and methanol and water in the second pickup chamber. The pressure of anisole and methanol fixed at  $\sim 2 \times 10^{-6}$  mbar and  $\sim 15 \times 10^{-6}$  mbar and partial pressure of water was varied.

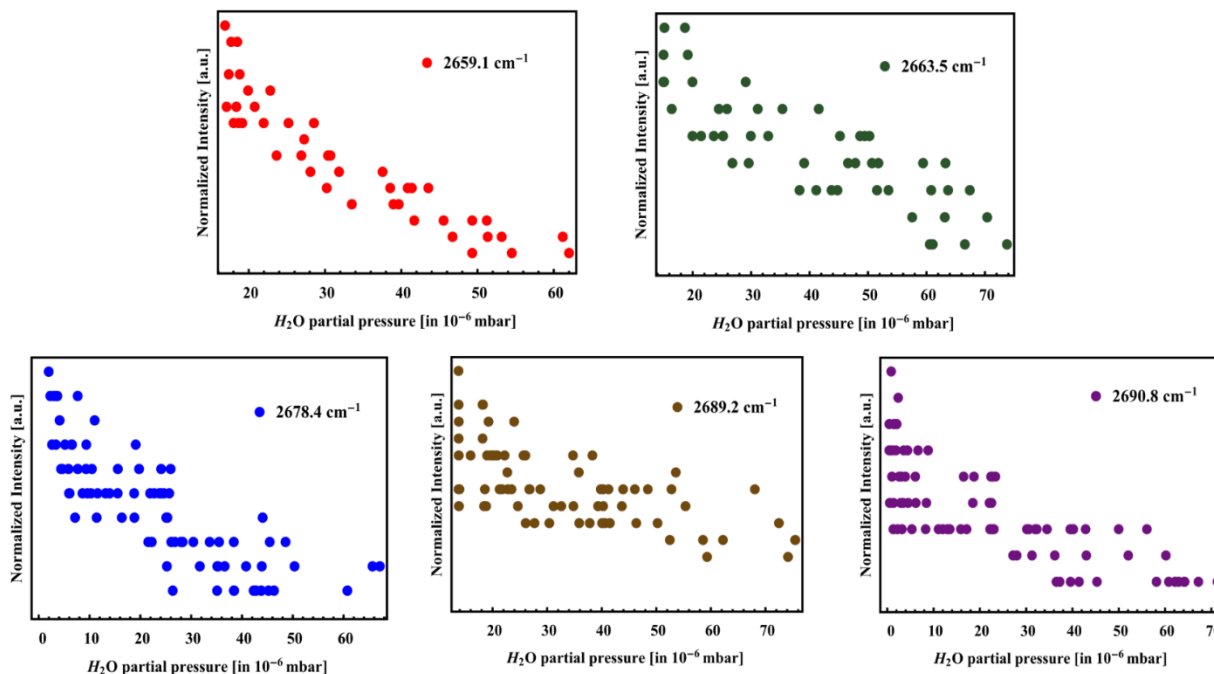

**Figure S1:** Pickup curves of water at distinct observed IR bands, measured at  $m/z \geq 22$ . The anisole partial pressure kept fixed at  $\sim 2 \times 10^{-6}$  mbar while methanol partial pressure fixed at  $\sim 15 \times 10^{-6}$  mbar.

The intensities of all the observed bands in this study was found to decrease with water pressure. This confirms that none of the observed bands depend on water and are from anisole...methanol cluster.

### 3. Cartesian coordinates for the optimized molecular geometries

a. The cartesian coordinates for the the five optimized structures anisole...methanol complex and (methanol-d<sub>4</sub>)-dimer are given below. The geometry optimization was performed at MP2/6-311++G(d,p) level of theory.

#### *Structure 1*

| Atom label | Atom | x (Å)    | y (Å)    | z (Å)    |
|------------|------|----------|----------|----------|
| 1          | C    | -1.83896 | -0.33153 | 1.22884  |
| 2          | C    | -0.61677 | -0.93106 | 0.88570  |
| 3          | C    | -0.10226 | -0.75705 | -0.40909 |
| 4          | C    | -0.81980 | 0.00257  | -1.34884 |
| 5          | C    | -2.03616 | 0.58772  | -0.99608 |
| 6          | C    | -2.55062 | 0.43181  | 0.29978  |
| 7          | H    | -2.22743 | -0.46779 | 2.23475  |
| 8          | H    | -0.08015 | -1.50938 | 1.62919  |
| 9          | H    | -0.40495 | 0.11540  | -2.34659 |
| 10         | H    | -2.57978 | 1.17323  | -1.73288 |
| 11         | H    | -3.49462 | 0.89196  | 0.57593  |
| 12         | O    | 1.08484  | -1.26354 | -0.84473 |
| 13         | C    | 1.92987  | -1.84538 | 0.14484  |
| 14         | H    | 1.47618  | -2.74681 | 0.57145  |
| 15         | H    | 2.84602  | -2.11800 | -0.37823 |
| 16         | H    | 2.15311  | -1.12079 | 0.93455  |
| 17         | O    | 1.50548  | 1.55477  | 1.04961  |
| 18         | H    | 0.58591  | 1.27937  | 0.98046  |
| 19         | C    | 1.87317  | 2.08809  | -0.21767 |
| 20         | H    | 1.24375  | 2.93952  | -0.50103 |
| 21         | H    | 2.90389  | 2.43398  | -0.12612 |
| 22         | H    | 1.82448  | 1.32819  | -1.00586 |

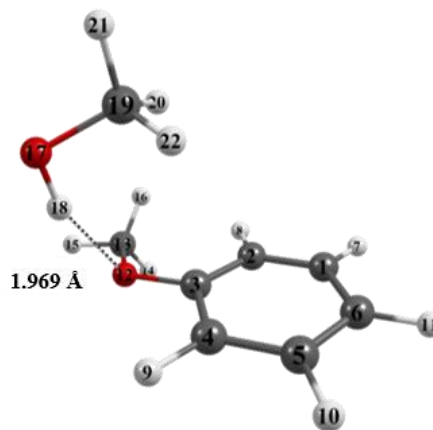

## Structure 2

| Atom label | Atom | x (Å)    | y (Å)    | z (Å)    |
|------------|------|----------|----------|----------|
| 1          | C    | 1.79825  | -0.28667 | -1.29343 |
| 2          | C    | 0.53290  | -0.81037 | -0.98841 |
| 3          | C    | 0.06725  | -0.74835 | 0.33173  |
| 4          | C    | 0.85992  | -0.16554 | 1.33291  |
| 5          | C    | 2.11502  | 0.35316  | 1.01481  |
| 6          | C    | 2.58885  | 0.30355  | -0.30437 |
| 7          | H    | 2.15533  | -0.33625 | -2.31878 |
| 8          | H    | -0.06840 | -1.24673 | -1.77752 |
| 9          | H    | 0.47637  | -0.13986 | 2.34933  |
| 10         | H    | 2.72183  | 0.80066  | 1.79747  |
| 11         | H    | 3.56593  | 0.70751  | -0.55248 |
| 12         | O    | -1.16977 | -1.17629 | 0.73786  |
| 13         | C    | -1.94569 | -1.88545 | -0.22643 |
| 14         | H    | -1.40472 | -2.76700 | -0.58627 |
| 15         | H    | -2.84902 | -2.19681 | 0.29700  |
| 16         | H    | -2.21403 | -1.23484 | -1.06489 |
| 17         | O    | -2.20086 | 1.47103  | -0.17657 |
| 18         | H    | -1.94553 | 0.81590  | 0.48115  |
| 19         | C    | -1.15225 | 2.43088  | -0.24635 |
| 20         | H    | -0.20358 | 1.97817  | -0.55664 |
| 21         | H    | -1.45108 | 3.16900  | -0.99235 |
| 22         | H    | -1.00385 | 2.94492  | 0.71073  |

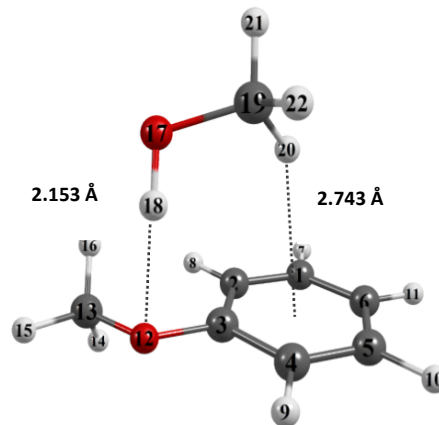

### Structure 3

| Atom label | Atom | x (Å)    | y (Å)    | z (Å)    |
|------------|------|----------|----------|----------|
| 1          | C    | -1.83896 | -0.33153 | 1.22884  |
| 2          | C    | -0.61677 | -0.93106 | 0.88579  |
| 3          | C    | -0.10226 | -0.75705 | -0.40910 |
| 4          | C    | -0.81980 | 0.00257  | -1.34885 |
| 5          | C    | -2.03616 | 0.58772  | -0.99608 |
| 6          | C    | -2.55062 | 0.43181  | 0.29978  |
| 7          | H    | -2.22743 | -0.46779 | 2.23475  |
| 8          | H    | -0.08015 | -1.50938 | 1.62919  |
| 9          | H    | -0.40495 | 0.11540  | -2.34659 |
| 10         | H    | -2.57978 | 1.17323  | -1.73288 |
| 11         | H    | -3.49462 | 0.89196  | 0.57593  |
| 12         | O    | 1.08484  | -1.26354 | -0.84474 |
| 13         | C    | 1.92987  | -1.84538 | 0.14484  |
| 14         | H    | 1.47618  | -2.74681 | 0.57145  |
| 15         | H    | 2.84602  | -2.11800 | -0.37824 |
| 16         | H    | 2.15311  | -1.12079 | 0.93455  |
| 17         | O    | 1.50548  | 1.55477  | 1.04961  |
| 18         | H    | 0.58591  | 1.27937  | 0.98046  |
| 19         | C    | 1.87317  | 2.08809  | -0.21768 |
| 20         | H    | 1.24375  | 2.93952  | -0.50104 |
| 21         | H    | 2.90389  | 2.43398  | -0.12613 |
| 22         | H    | 1.82448  | 1.32819  | -1.00586 |

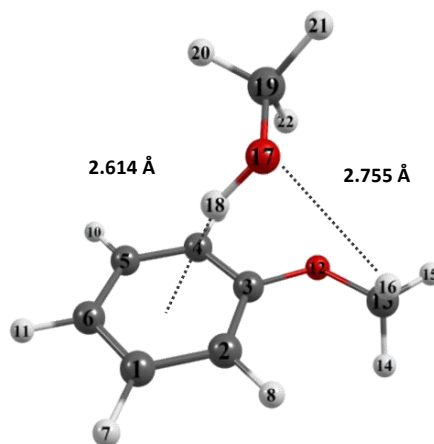

### Structure 4

| Atom label | Atom | x (Å)    | y (Å)    | z (Å)    |
|------------|------|----------|----------|----------|
| 1          | C    | 1.08157  | -1.15963 | 1.28755  |
| 2          | C    | -0.26173 | -0.84570 | 1.02456  |
| 3          | C    | -0.67070 | -0.62068 | -0.29864 |
| 4          | C    | 0.26269  | -0.71535 | -1.34502 |
| 5          | C    | 1.59419  | -1.02714 | -1.07027 |
| 6          | C    | 2.01396  | -1.25142 | 0.25081  |
| 7          | H    | 1.39123  | -1.32969 | 2.31521  |
| 8          | H    | -0.96118 | -0.77856 | 1.85004  |
| 9          | H    | -0.07998 | -0.53946 | -2.36077 |
| 10         | H    | 2.30641  | -1.09387 | -1.88813 |
| 11         | H    | 3.05079  | -1.49228 | 0.46498  |
| 12         | O    | -1.94153 | -0.29730 | -0.67378 |
| 13         | C    | -2.91261 | -0.22556 | 0.36129  |
| 14         | H    | -2.65932 | 0.55227  | 1.09052  |
| 15         | H    | -3.85001 | 0.02989  | -0.13149 |
| 16         | H    | -3.01750 | -1.18921 | 0.87217  |
| 17         | O    | 1.41684  | 2.22933  | 0.30455  |
| 18         | H    | 1.42577  | 1.26785  | 0.27391  |
| 19         | C    | 0.10915  | 2.64420  | -0.05715 |
| 20         | H    | 0.11531  | 3.73537  | -0.07093 |
| 21         | H    | -0.18070 | 2.27999  | -1.04983 |
| 22         | H    | -0.64255 | 2.30906  | 0.66911  |

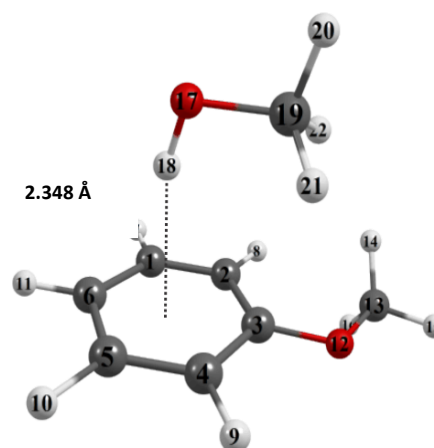

### Structure 5

| Atom label | Atom | x (Å)    | y (Å)    | z (Å)    |
|------------|------|----------|----------|----------|
| 1          | C    | -0.75040 | 0.98301  | 1.40848  |
| 2          | C    | 0.46773  | 0.33963  | 1.14215  |
| 3          | C    | 1.03648  | 0.43950  | -0.13744 |
| 4          | C    | 0.38628  | 1.18820  | -1.13406 |
| 5          | C    | -0.82461 | 1.82437  | -0.85502 |
| 6          | C    | -1.40382 | 1.72272  | 0.41930  |
| 7          | H    | -1.18398 | 0.90004  | 2.40184  |
| 8          | H    | 0.95146  | -0.23033 | 1.92738  |
| 9          | H    | 0.84543  | 1.24796  | -2.11660 |
| 10         | H    | -1.31869 | 2.39593  | -1.63615 |
| 11         | H    | -2.34615 | 2.21719  | 0.63579  |
| 12         | O    | 2.20985  | -0.14365 | -0.50922 |
| 13         | C    | 2.72618  | -1.13953 | 0.36610  |
| 14         | H    | 1.97942  | -1.91994 | 0.54873  |
| 15         | H    | 3.58646  | -1.56603 | -0.14850 |
| 16         | H    | 3.05317  | -0.70508 | 1.31727  |
| 17         | O    | -1.34137 | -1.79337 | -0.91098 |
| 18         | H    | -1.02874 | -0.88618 | -0.83994 |
| 19         | C    | -2.28323 | -1.98794 | 0.13307  |
| 20         | H    | -2.66471 | -3.00520 | 0.03096  |
| 21         | H    | -1.82344 | -1.88250 | 1.12329  |
| 22         | H    | -3.12584 | -1.28968 | 0.06181  |

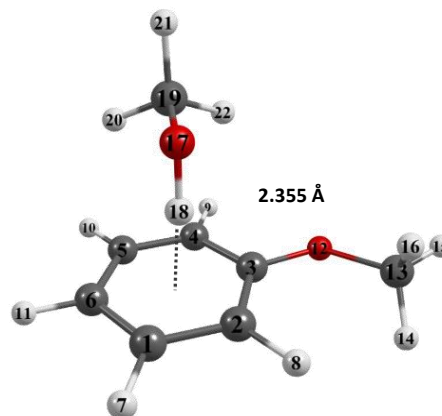



### *Methanol dimer*

| Atom label | Atom | x (Å)    | y (Å)    | z (Å)    |
|------------|------|----------|----------|----------|
| 1          | C    | -2.16539 | -0.38606 | -0.24840 |
| 2          | H    | -1.63125 | -1.01398 | -0.96047 |
| 3          | H    | -2.47473 | -1.00212 | 0.60120  |
| 4          | H    | -3.04778 | 0.03715  | -0.73744 |
| 5          | O    | -1.25240 | 0.63929  | 0.15090  |
| 6          | H    | -1.69121 | 1.18938  | 0.80464  |
| 7          | C    | 2.22812  | 0.20272  | -0.32682 |
| 8          | H    | 3.18297  | -0.32517 | -0.30760 |
| 9          | H    | 1.89777  | 0.28108  | -1.37027 |
| 10         | H    | 2.38703  | 1.21540  | 0.06483  |
| 11         | O    | 1.31874  | -0.53956 | 0.46581  |
| 12         | H    | 0.47006  | -0.07962 | 0.42262  |

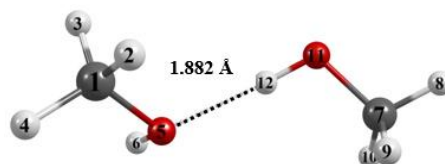

b. The cartesian coordinates for the the three optimized structures anisole...methanol complex and (methanol-d<sub>4</sub>)-dimer are given below. The geometry optimization was performed at *B3LZP-D3/aug-cc-pVTZ* level of theory.

**Structure I**

| Atom label | Atom | x (Å)    | y (Å)    | z (Å)    |
|------------|------|----------|----------|----------|
| 1          | C    | 2.21147  | -0.40228 | -1.02719 |
| 2          | C    | 0.97738  | -0.99772 | -0.72449 |
| 3          | C    | 0.25214  | -0.53811 | 0.38192  |
| 4          | C    | 0.75777  | 0.49779  | 1.18145  |
| 5          | C    | 1.98300  | 1.08382  | 0.86442  |
| 6          | C    | 2.71746  | 0.63736  | -0.24387 |
| 7          | H    | 2.77263  | -0.76078 | -1.88610 |
| 8          | H    | 0.60433  | -1.80004 | -1.35092 |
| 9          | H    | 0.17530  | 0.82764  | 2.03738  |
| 10         | H    | 2.36681  | 1.88736  | 1.48719  |
| 11         | H    | 3.67250  | 1.09251  | -0.48868 |
| 12         | O    | -0.98274 | -1.01414 | 0.74995  |
| 13         | C    | -1.46597 | -2.15927 | 0.05260  |
| 14         | H    | -0.76864 | -2.99700 | 0.15491  |
| 15         | H    | -2.41705 | -2.40949 | 0.52107  |
| 16         | H    | -1.62903 | -1.93749 | -1.00758 |
| 17         | O    | -2.75143 | 1.19292  | 0.10923  |
| 18         | H    | -2.23625 | 0.48620  | 0.51574  |
| 19         | C    | -1.98235 | 1.67016  | -0.98480 |
| 20         | H    | -1.76718 | 0.87884  | -1.71499 |
| 21         | H    | -2.57428 | 2.44143  | -1.48062 |
| 22         | H    | -1.03125 | 2.10996  | -0.66128 |

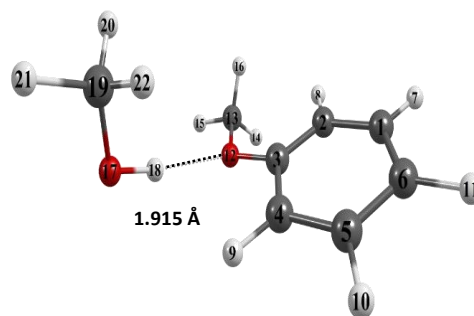

## Structure II

| Atom label | Atom | x (Å)    | y (Å)    | z (Å)    |
|------------|------|----------|----------|----------|
| 1          | C    | -1.83896 | -0.33153 | 1.22884  |
| 2          | C    | -0.61677 | -0.93106 | 0.88579  |
| 3          | C    | -0.10226 | -0.75705 | -0.40910 |
| 4          | C    | -0.81980 | 0.00257  | -1.34885 |
| 5          | C    | -2.03616 | 0.58772  | -0.99608 |
| 6          | C    | -2.55062 | 0.43181  | 0.29978  |
| 7          | H    | -2.22743 | -0.46779 | 2.23475  |
| 8          | H    | -0.08015 | -1.50938 | 1.62919  |
| 9          | H    | -0.40495 | 0.11540  | -2.34659 |
| 10         | H    | -2.57978 | 1.173231 | -1.73288 |
| 11         | H    | -3.49462 | 0.89196  | 0.57593  |
| 12         | O    | 1.08484  | -1.26354 | -0.84474 |
| 13         | C    | 1.92987  | -1.84538 | 0.14484  |
| 14         | H    | 1.47618  | -2.74681 | 0.57145  |
| 15         | H    | 2.84606  | -2.11800 | -0.37824 |
| 16         | H    | 2.15312  | -1.12079 | 0.93455  |
| 17         | O    | 1.50548  | 1.55477  | 1.04961  |
| 18         | H    | 0.58591  | 1.27937  | 0.98046  |
| 19         | C    | 1.87317  | 2.08809  | -0.21768 |
| 20         | H    | 1.24375  | 2.93952  | -0.50104 |
| 21         | H    | 2.90389  | 2.43398  | -0.12613 |
| 22         | H    | 1.82448  | 1.32819  | -1.00586 |

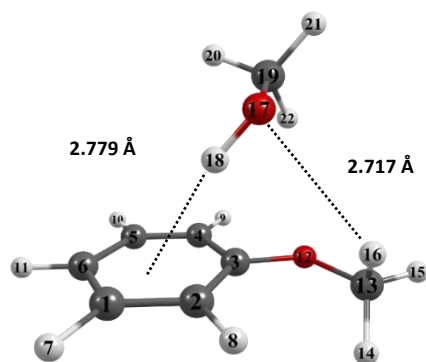

### Structure III

| Atom label | Atom | x (Å)    | y (Å)    | z (Å)    |
|------------|------|----------|----------|----------|
| 1          | C    | 1.08157  | -1.15963 | 1.28755  |
| 2          | C    | -0.26173 | -0.84570 | 1.02456  |
| 3          | C    | -0.67070 | -0.62068 | -0.29864 |
| 4          | C    | 0.26269  | -0.71535 | -1.34502 |
| 5          | C    | 1.59419  | -1.02714 | -1.07027 |
| 6          | C    | 2.01396  | -1.25142 | 0.25081  |
| 7          | H    | 1.39123  | -1.32969 | 2.31521  |
| 8          | H    | -0.96118 | -0.77856 | 1.85004  |
| 9          | H    | -0.07998 | -0.53946 | -2.36077 |
| 10         | H    | 2.30641  | -1.09387 | -1.88813 |
| 11         | H    | 3.05079  | -1.49228 | 0.46498  |
| 12         | O    | -1.94153 | -0.29730 | -0.67378 |
| 13         | C    | -2.91261 | -0.2255  | 0.361293 |
| 14         | H    | -2.65932 | 0.55227  | 1.09052  |
| 15         | H    | -3.85001 | 0.02989  | -0.13149 |
| 16         | H    | -3.01750 | -1.18921 | 0.872178 |
| 17         | O    | 1.41684  | 2.22933  | 0.304557 |
| 18         | H    | 1.42577  | 1.26785  | 0.273917 |
| 19         | C    | 0.10915  | 2.64420  | -0.05715 |
| 20         | H    | 0.11531  | 3.735371 | -0.07093 |
| 21         | H    | -0.18070 | 2.27999  | -1.04983 |
| 22         | H    | -0.64255 | 2.30906  | 0.669119 |

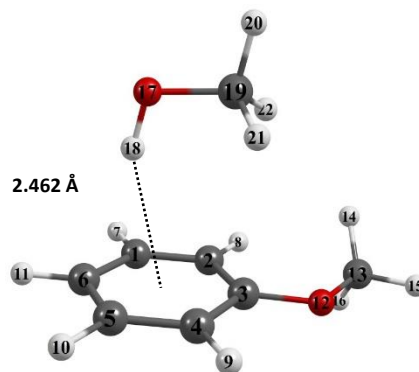

### *Methanol dimer*

| Atom label | Atom | x (Å)    | y (Å)    | z (Å)    |
|------------|------|----------|----------|----------|
| 1          | C    | -1.82962 | 0.56187  | 0.14985  |
| 2          | H    | -1.06571 | 1.30581  | -0.11442 |
| 3          | H    | -2.71415 | 0.72211  | -0.49440 |
| 4          | H    | -2.12268 | 0.71461  | 1.20462  |
| 5          | O    | -1.23109 | -0.71362 | -0.06689 |
| 6          | H    | -1.87626 | -1.38381 | 0.18451  |
| 7          | C    | 1.91826  | -0.01405 | 0.49608  |
| 8          | H    | 2.76618  | 0.68517  | 0.57454  |
| 9          | H    | 1.25399  | 0.16532  | 1.36703  |
| 10         | H    | 2.32148  | -1.04615 | 0.59515  |
| 11         | O    | 1.28234  | 0.20267  | -0.74195 |
| 12         | H    | 0.49524  | -0.36240 | -0.72199 |

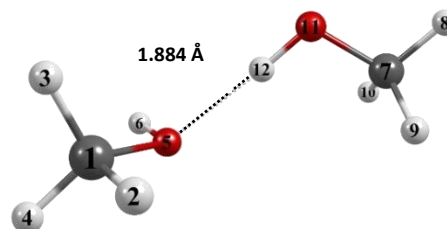

#### 4. Computed vibrational spectra of anisole

**Table S2** : Frequency and IR intensity of calculated IR spectra of anisole molecule at MP2/6-311++G (d,p) level theory.

| Frequency(cm <sup>-1</sup> ) | IR intensity |
|------------------------------|--------------|
| 52.6                         | 4.6          |
| 145.7                        | 0.6          |
| 204.6                        | 0.5          |
| 264.2                        | 0.5          |
| 266.9                        | 2.5          |
| 361.5                        | 0            |
| 445.4                        | 0.8          |
| 481.6                        | 5.8          |
| 556.6                        | 5.1          |
| 618.0                        | 0.3          |
| 704.3                        | 106.3        |
| 782.3                        | 0.8          |
| 797.2                        | 16.7         |
| 805.6                        | 1.2          |
| 841.1                        | 0.2          |
| 856.5                        | 0            |
| 1005.6                       | 0.7          |
| 1042.5                       | 2.5          |
| 1085.8                       | 39.3         |
| 1103.4                       | 14.5         |
| 1176.9                       | 1.4          |
| 1183.5                       | 1.2          |
| 1197.6                       | 11.2         |
| 1218.7                       | 9.5          |
| 1295.3                       | 238.6        |
| 1338.2                       | 0.7          |
| 1455.1                       | 9.3          |
| 1481.8                       | 0            |
| 1493.1                       | 22.4         |
| 1504.3                       | 7.8          |
| 1527.7                       | 114.4        |
| 1535.3                       | 0.6          |
| 1631.7                       | 18.8         |
| 1649.8                       | 69.3         |
| 3053.8                       | 47.9         |
| 3132.5                       | 33.2         |
| 3198.9                       | 19.4         |
| 3202.3                       | 0.7          |
| 3210.2                       | 8.3          |
| 3225.8                       | 12.3         |
| 3232.9                       | 8.6          |
| 3246.4                       | 3.7          |
